# Supplementary material
Source: Springer Nature journal article supplement (https://www.springermedizin.de/resource/supplementary/12916_2011_430_MOESM3_ESM.pdf/9599942)

**A**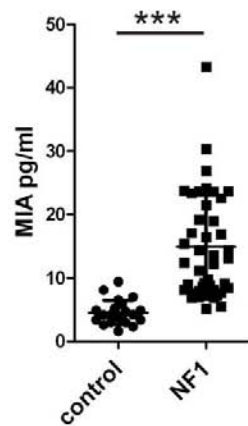**B**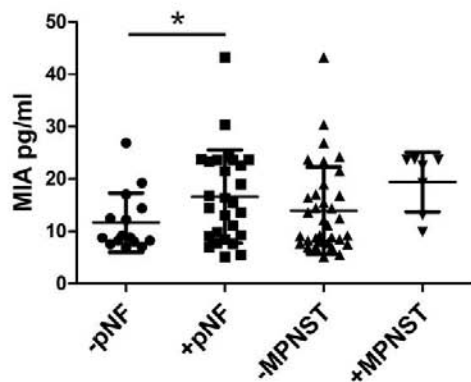**C**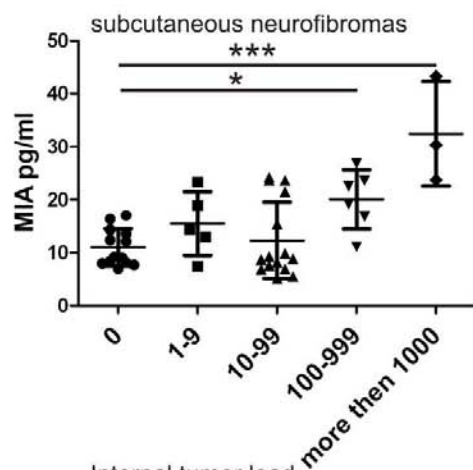**D**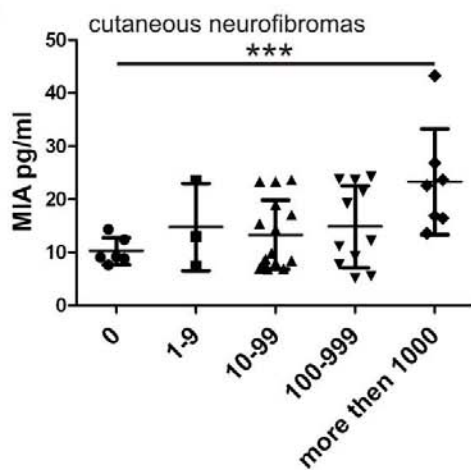**E**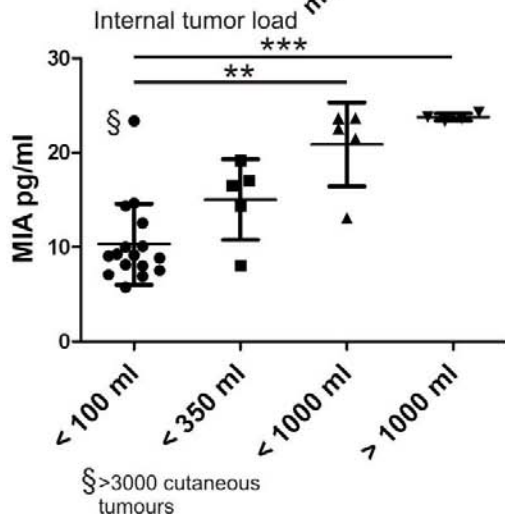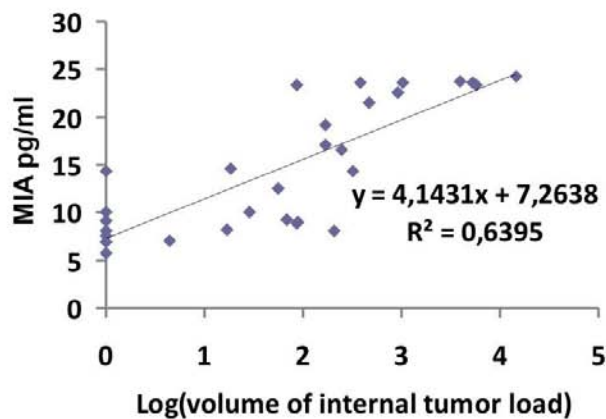

Supplement: MOESM3 [file 9599942]
